# Supplementary material
Source: Research Square preprint supplement (doi:10.21203/rs.3.rs-9576747/v1)
Supplement: Supplementary file 1 [file 0e52c4b339abc35b49ddd1d7.docx]

**Supplementary Figures**

**
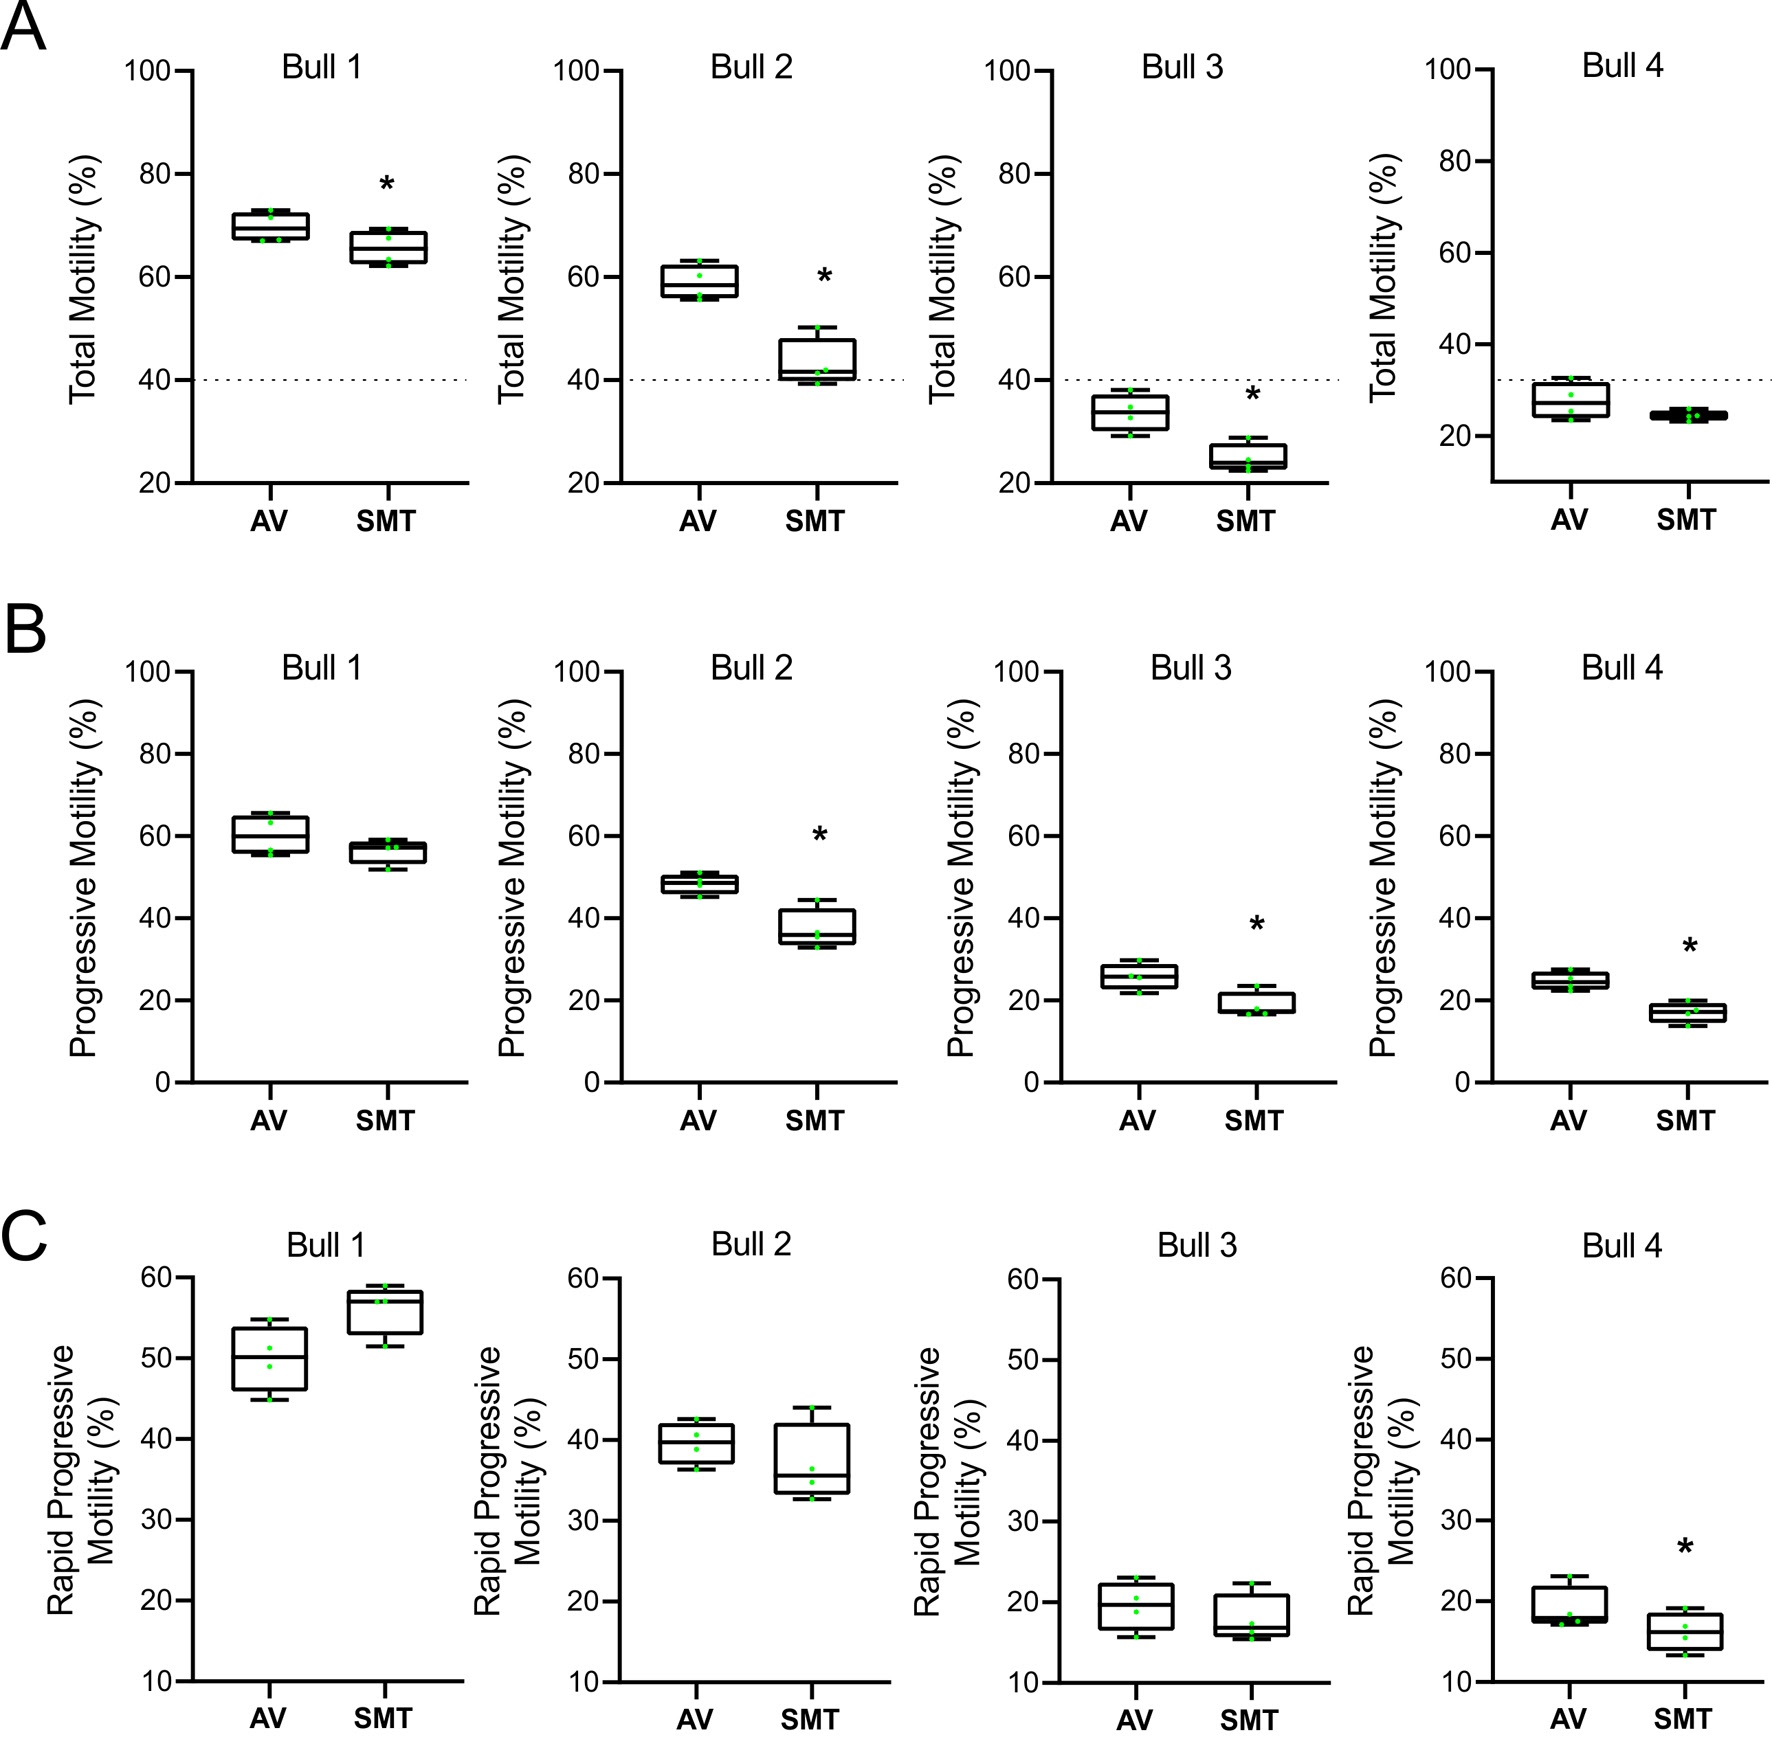
**

**Supplementary Fig. 1** Comparative sperm motility percentage reports across individual bulls using AV and SMT software. The analysis includes semen samples of varying quality (Bull 1 to 4). The dotted line represents an arbitrary motility threshold for classification. The dots in the box plot represent individual data points. **A.** Total Motility. **B.** Progressive Motility. **C.** Rapid Progressive Motility. ***** indicates a statistically significant difference between the two CASA systems

**
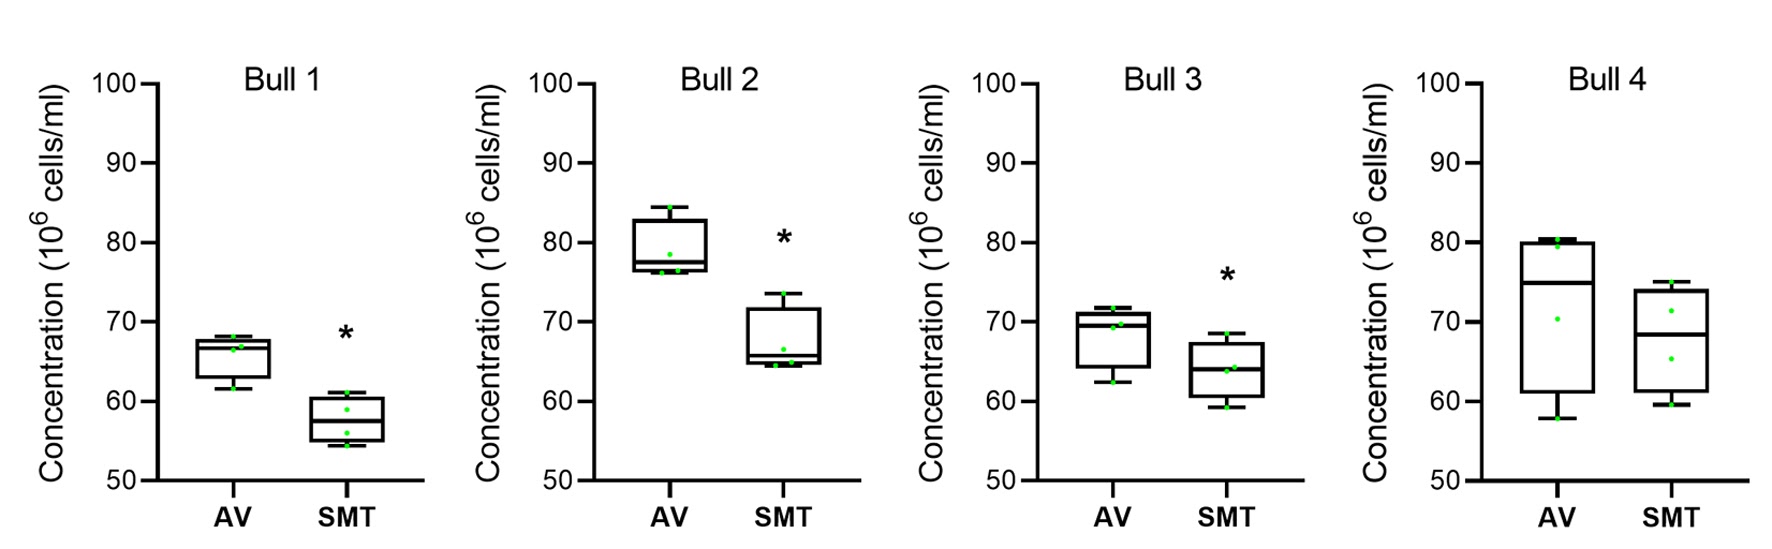
**

**Supplementary Fig. 2** Comparative sperm concentration reports between AV and SMT software. The analysis includes semen samples from four different bulls (n=16 videos). The dots in the box plot represent individual data points. ***** indicates a statistically significant difference between the two CASA systems
