# Supplementary material
Source: Research Square preprint supplement (doi:10.21203/rs.3.rs-9576747/v1)
Supplement: Supplementary file 2 [file 585d6cee8a11ed7d67f8a476.docx]

| **SUPPLEMENTARY TABLE 1. Kinetic sperm parameters analyzed by AV and SMT** | | | | | |
| --- | --- | --- | --- | --- | --- |
| Kinetic Parameter |  | BULL 1 | BULL 2 | BULL 3 | BULL 4 |
| VCL (um/s) | AV | 174.88 ± 116.55 | 163.03 ± 114.99 | 125.94 ± 86.14 | 128.20 ± 81.93 |
| SMT | 269.66 ± 106.88 | 226.06 ± 93.81 | 166.87 ± 81.20 | 151.44 ± 62.77 |
| VSL (um/s) | AV | 75.78 ± 74.96 | 72.13 ± 79.99 | 70.14 ± 75.54 | 66.26 ± 71.43 |
| SMT | 128.89 ± 93.37 | 118.57 ± 77.32 | 91.16 ± 60.03 | 77.89 ± 49.08 |
| VAP (um/s) | AV | 90.63 ± 73.77 | 86.91 ± 79.69 | 77.86 ± 73.64 | 75.54 ± 69.36 |
| SMT | 162.21 ± 90.45 | 144.46 ± 78.22 | 106.93 ± 62.11 | 93.10 ± 49.90 |
| LIN (%) | AV | 79.11 ± 20.75 | 78.25 ± 20.60 | 84.05 ± 17.61 | 82.48 ± 18.49 |
| SMT | 60.06 ± 25.66 | 79.67 ± 17.62 | 83.32 ± 13.66 | 51.44 ± 18.87 |
| STR (%) | AV | 44.86 ± 24.78 | 45.12 ± 26.10 | 53.58 ± 27.46 | 49.57 ± 25.15 |
| SMT | 62.20 ± 24.38 | 51.75 ± 20.43 | 54.56 ± 19.53 | 67.25 ± 34.37 |
| WOB (%) | AV | 53.76 ± 20.10 | 54.40 ± 21.37 | 60.79 ± 23.31 | 57.62 ± 20.53 |
| SMT | 59.32 ± 16.14 | 63.03 ± 15.48 | 64.00 ± 16.06 | 61.39 ± 15.34 |
| ALH (um) | AV | 1.59 ± 1.08 | 1.49 ± 1.09 | 1.03 ± 0.81 | 1.20 ± 0.81 |
| SMT | 2.38 ± 1.25 | 1.96 ± 1.08 | 1.41 ± 0.88 | 1.36 ± 0.79 |
| BCF (Hz) | AV | 13.99 ± 10.45 | 12.80 ± 9.84 | 12.29 ± 10.59 | 12.88 ± 9.53 |
| SMT | 24.12 ± 10.23 | 21.26 ± 9.80 | 19.67 ± 12.12 | 18.64 ± 10.33 |
| Values are expressed as the mean ± SD for each CASA system (4 bulls). VAP: Average Path  Velocity, VSL: Straight-Line Velocity, VCL: Curvilinear Velocity, ALH: Amplitude of Lateral Head  Displacement, BCF: Beat Cross Frequency. *Indicates statistically significant difference between CASA systems. | | | | | |
